# Supplementary material for: Biosynthesis of Phytocannabinoids and Structural Insights: A Review
Source: MDPI journal article supplement (doi:10.3390/metabo13030442), 2023-03-17
Supplement: s1 [file s1]

**Table S1.** Predicted nucleotide composition among tetrahydrocannabinolic acid (THCA) and Cannabidiolic acid (CBDA) synthase using BioEdit software.

| <b>Accession</b> |   | <b>MW382908.1</b>                    | <b>MW429550.1</b>           |
|------------------|---|--------------------------------------|-----------------------------|
| Gene             |   | Tetrahydrocannabinolic acid synthase | Cannabidiolic acid synthase |
| Length (bp)      |   | 1638                                 | 1635                        |
| SSMW             |   | 495687                               | 495101                      |
| DSMW             |   | 992139                               | 990612                      |
| Nucleotide       | A | 534                                  | 522                         |
|                  | C | 282                                  | 296                         |
|                  | G | 323                                  | 325                         |
|                  | T | 499                                  | 492                         |
| G+C content      |   | 36.94                                | 37.98                       |
| A+T content      |   | 63.06                                | 62.02                       |

Note: SSMW: Single strand molecular weight; DSMW: Double strand molecular weight; bp: Base pair.
